# Supplementary material for: Acceleration of leukocytes’ epigenetic age as an early tumor and sex-specific marker of breast and colorectal cancer
Source: PubMed Central journal article supplement (PMC5410300; doi:10.18632/oncotarget.15573), 2017-02-21
Supplement: oncotarget-08-23237-s001.pdf [file oncotarget-08-23237-s001.pdf]

## Acceleration of leukocytes' epigenetic age as an early tumor- and sex-specific marker of breast and colorectal cancer

### Supplementary Materials

**Supplementary Table 1: Regression  $p$  values**

|             | Horvath |       | Hannum  |       | Weidner |       | ELOVL2  |       | FHL2    |       |
|-------------|---------|-------|---------|-------|---------|-------|---------|-------|---------|-------|
|             | Age Acc | IEAA  | Age Acc | IEAA  | Age Acc | IEAA  | Age Acc | IEAA  | Age Acc | IEAA  |
| BRC females | 0.635   | 0.433 | 0.426   | 0.135 | 0.242   | 0.266 | 0.043   | 0.065 | 0.089   | 0.941 |
| CRC males   | 0.421   | 0.164 | 0.128   | 0.369 | 0.712   | 0.283 | 0.571   | 0.322 | 0.036   | 0.097 |
| CRC females | 0.840   | 0.958 | 0.797   | 0.805 | 0.380   | 0.186 | 0.152   | 0.223 | 0.139   | 0.117 |

$P$  values from regression models for each epigenetic clock estimator (with and without blood cells counts as covariates).

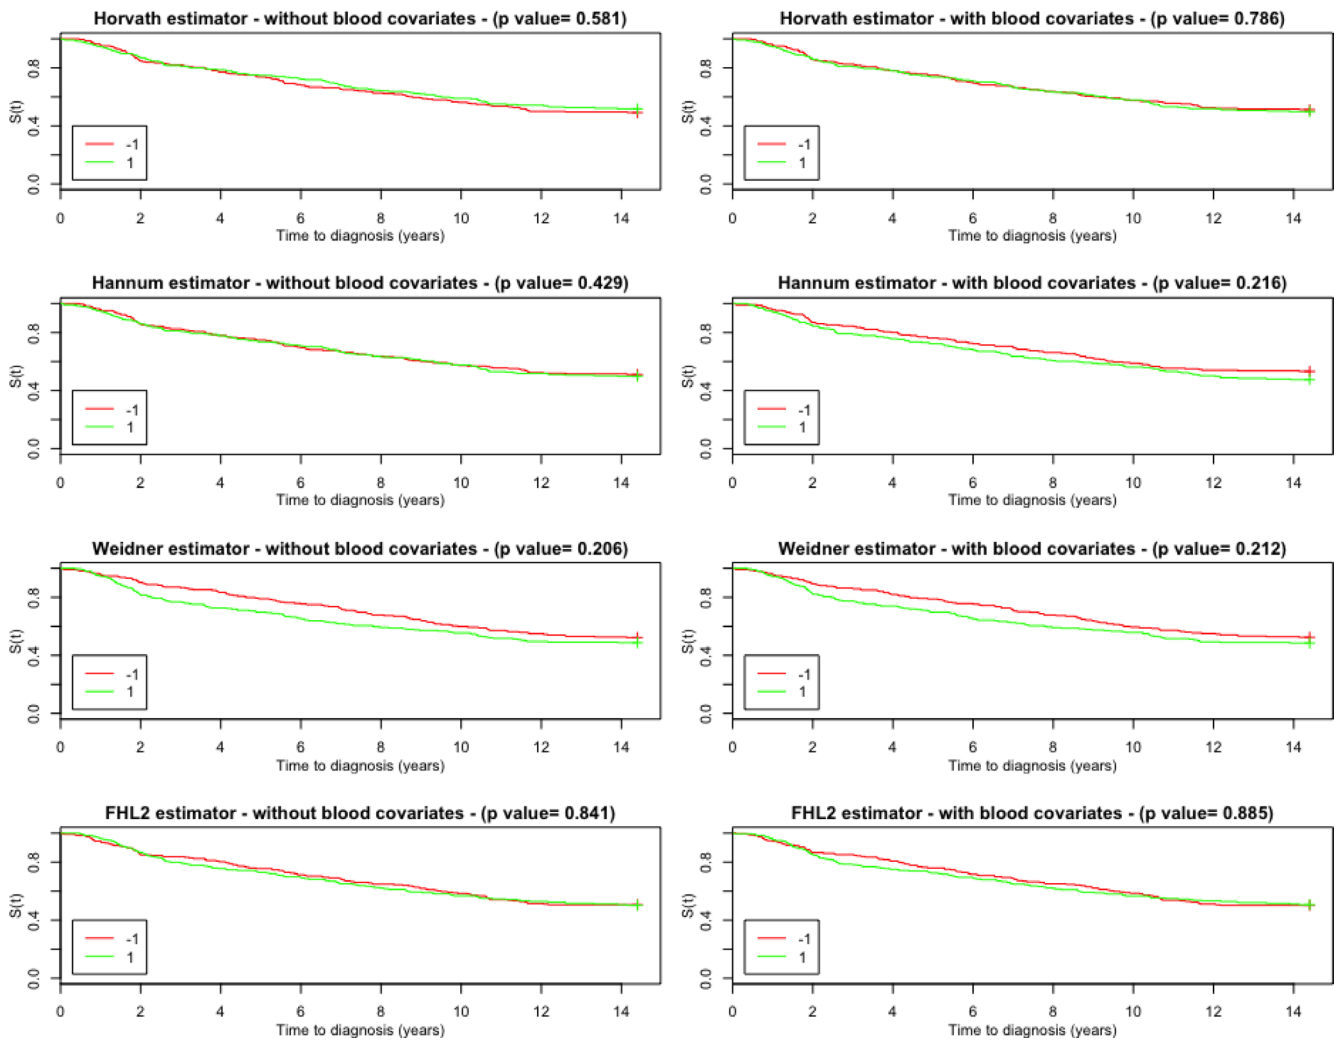

**Supplementary Figure 1 : Survival functions for subjects belonging to the breast cancer group (including controls) estimated with Kaplan-Meier method.** Results are shown separately for accelerated (1) and decelerated (–1) age subjects, with age acceleration computed considering Horvath, Hannum, Weidner and FHL2 estimators that showed non-significant differences between cases and controls. In each chart title, we reported the Log-Rank test  $p$ -values comparing survival curves.

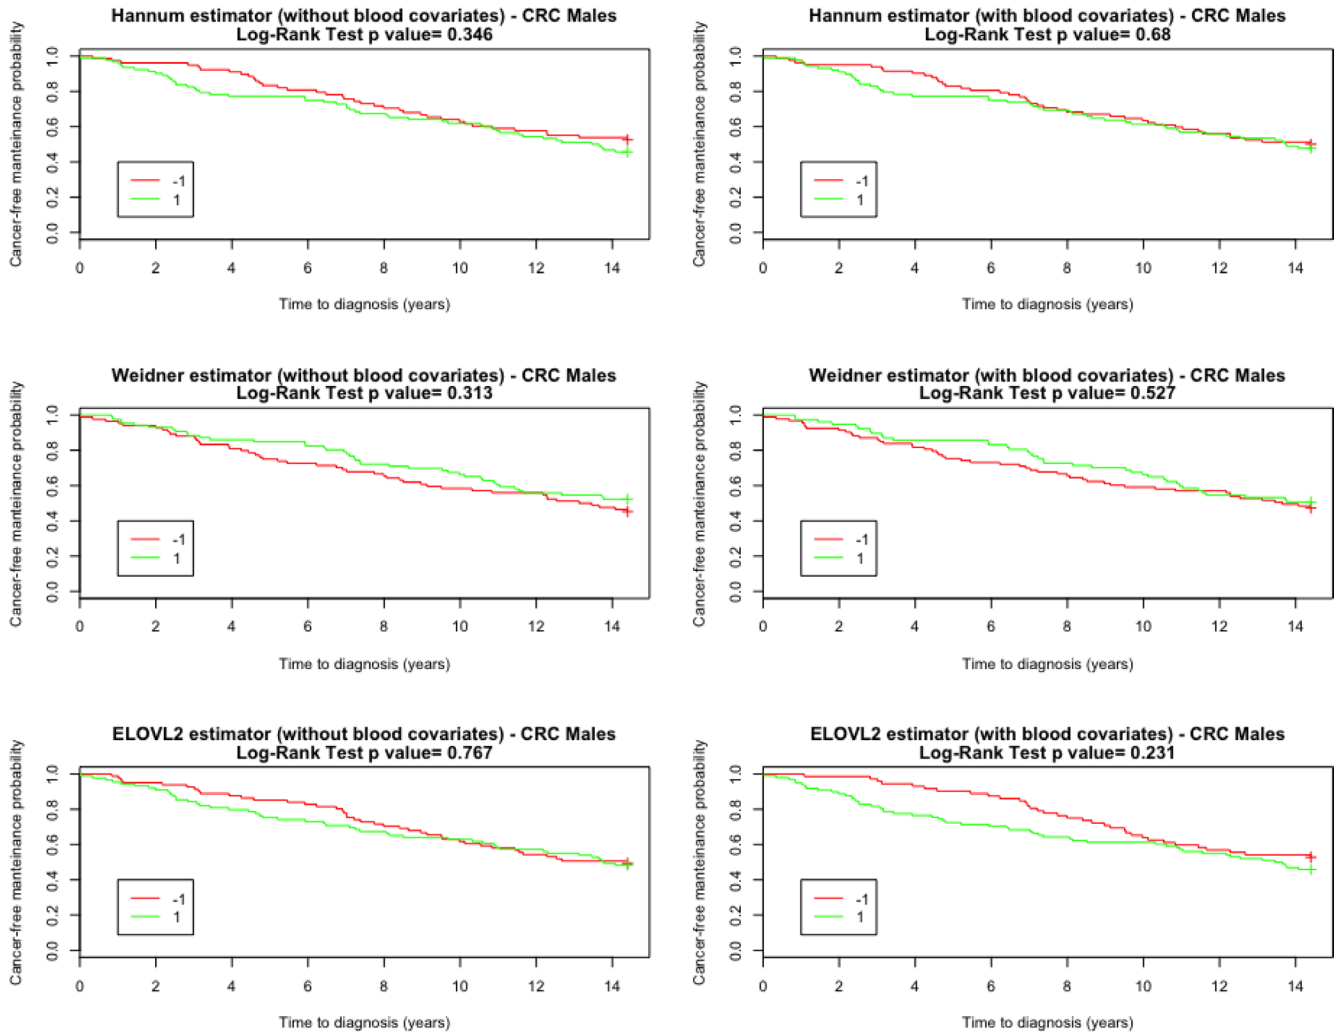

**Supplementary Figure 2: Survival functions for subjects belonging to the CRC male cancer group (including controls) estimated with Kaplan-Meier method.** Results are shown separately for accelerated (1) and decelerated (-1) age subjects, with age acceleration computed considering the Hannum, Weidner and ELOVL2 estimators that showed non-significant differences between cases and controls. In each chart title, we reported the Log-Rank test  $p$ -values comparing survival curves.

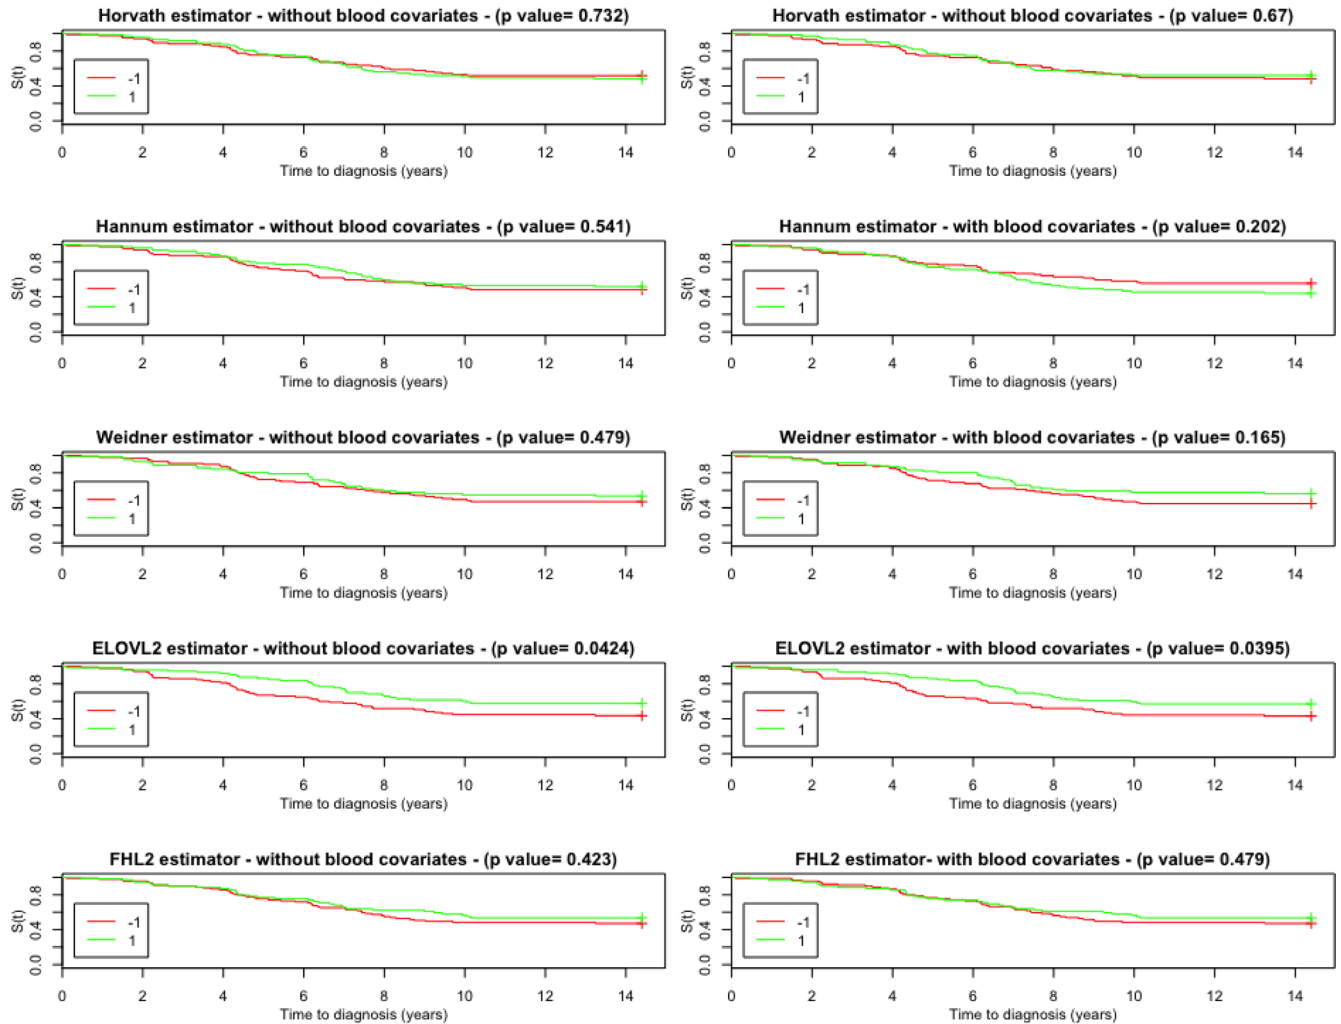

**Supplementary Figure 3: Survival functions for subjects belonging to the CRC female cancer group (including controls) estimated with Kaplan-Meier method.** Results are shown separately for accelerated (1) and decelerated (−1) age subjects, with age acceleration computed considering all estimators, which showed non-significant differences between cases and controls. In each chart title, we reported the Log-Rank test  $p$ -values comparing survival curves.
